# Supplementary material for: Genome comparison implies the role of Wsm2 in membrane trafficking and protein degradation
Source: PeerJ. 2018 Apr 23;6:e4678. doi: 10.7717/peerj.4678 (PMC5918131; doi:10.7717/peerj.4678)
Supplement: Table S2 [file peerj-06-4678-s004.xlsx]

## Sheet: Putative_function
Supplemental Table 2. Putative biochemical functions of Wsm2 candidates
Putative Mutations	Candidate IDs	Functional Domains			Putative Function
		Common	Rice_Specific	Wheat_Specific
Gain of an Activation Domain	TRAES3BF008300010CFD_c1	Usp
Gain of an Activation Domain	TRAES3BF064800040CFD_c1	RRM_1	Longin &Synaptobrevin		Membrane trafficking
Gain of an Activation Domain	TRAES3BF086200040CFD_c1	DUF342&UVR &YccV-like			Protein degradation
Gain of an Activation Domain	TRAES3BF013700060CFD_c1	MIP		DUF4341	Membrane trafficking
Gain of an Activation Domain	TRAES3BF025300010CFD_c1	Lin0512_fam
Gain of an Activation Domain	TRAES3BF058500060CFD_c1	WRKY		CbiG_N	TF
Gain of an Activation Domain	TRAES3BF082500030CFD_c1	DnaJ&DnaJ-X	Dehydrin&SR-25		Chaperone
Gain of an Activation Domain	TRAES3BF073300040CFD_c1
Gain of an Activation Domain	TRAES3BF030000010CFD_c1	DNA_pol_A_exo1			Exonuclease
Gain of an Activation Domain	TRAES3BF090300150CFD_c1	DUF642&DUF642
Gain of an Activation Domain	TRAES3BF060000040CFD_c1
Gain of an Activation Domain	TRAES3BF034700050CFD_c1	DUF4228
Gain of an Activation Domain	TRAES3BF041800030CFD_c1	DUF2712&Ribosom_S12_S23
Gain of an Activation Domain	TRAES3BF044200080CFD_c1	PTR2&PTR2	STE3&PBD
Gain of an Activation Domain	TRAES3BF078000010CFD_c1	RINGv&DUF3675			Ubiquitylation
Gain of an Activation Domain	TRAES3BF009000040CFD_c1	SRF-TF		HTH_Tnp_Mu_1	TF
Loss of a Inhibition Domain	TRAES3BF093200070CFD_c1	WD40&WD40&DWD&WD40&DWD&WD40&DWD&WD40			Ubiquitylation
Loss of a Inhibition Domain	TRAES3BF024700070CFD_c1	DUF647
Loss of a Inhibition Domain	TRAES3BF024700340CFD_c1	Glyco_trans_4_4		Glycos_transf_1	Glycosylation
Loss of a Inhibition Domain	TRAES3BF108800070CFD_c1	DIL	DUF616	IQ&Gla&DUF4201&Kinesin-relat_1&TSC22
Loss of a Inhibition Domain	TRAES3BF058200030CFD_c1	Pyridoxal_deC
Loss of a Inhibition Domain	TRAES3BF057900010CFD_c1	EamA&TPT			Membrane Proteins
Loss of a Inhibition Domain	TRAES3BF110600020CFD_c1	DUF490&DUF490	AsmA_2	DUF3971
Loss of a Inhibition Domain	TRAES3BF111600230CFD_c1	Acyltransferase		GvpK&Fez1	phospholipid biosynthesis
Loss of a Inhibition Domain	TRAES3BF080700030CFD_c1		Pkinase_Tyr	Malectin_like&Pkinase
Loss of a Inhibition Domain	TRAES3BF020300080CFD_c1			Bromodomain
Loss of a Inhibition Domain	TRAES3BF117100110CFD_c1	MraY_sig1&Glycos_transf_4			Glycosylation
Loss of a Inhibition Domain	TRAES3BF049800010CFD_c1	Ras
Loss of a Inhibition Domain	TRAES3BF038400060CFD_c1	Longin	DUF1237	Synaptobrevin	Membrane trafficking
Loss of a Inhibition Domain	TRAES3BF118400040CFD_c1	Peptidase_M22			Protein degradation
Loss of a Inhibition Domain	TRAES3BF090800020CFD_c1	GDI			Membrane trafficking
Loss of a Inhibition Domain	TRAES3BF029700040CFD_c1			Transglut_core2&TPR_9
Loss of a Inhibition Domain	TRAES3BF027200010CFD_c1
Loss of a Inhibition Domain	TRAES3BF109800010CFD_c1	Cnd2&Cnd2
Loss of a Inhibition Domain	TRAES3BF022700040CFD_c1	Glucan_synthase&Glucan_synthase		DUF605&FKS1_dom1	Glycosylation
Loss of a Inhibition Domain	TRAES3BF105800060CFD_c1	RabGAP-TBC
Loss of a Inhibition Domain	TRAES3BF042100030CFD_c1	AAA&Peptidase_M41	DUF1601&DUF1319	Beta_protein&Lzipper-MIP1&Tn7_Tnp_TnsA_C&zf-C4H2&Ribosomal_60s	Protein degradation
Loss of a Inhibition Domain	TRAES3BF118300080CFD_c1	S1&S1
Loss of a Inhibition Domain	TRAES3BF035500030CFD_c1	Methyltransf_31
Loss of a Inhibition Domain	TRAES3BF042200010CFD_c1	DUF1771&Smr
Loss of a Inhibition Domain	TRAES3BF115000170CFD_c1	Treslin_N	SLD3
Loss of a Inhibition Domain	TRAES3BF075000010CFD_c1	Glycos_transf_1		MBT	Glycosylation
Loss of a Inhibition Domain	TRAES3BF021000040CFD_c1	Adaptin_N		B2-adapt-app_C	Membrane trafficking
Loss of a Inhibition Domain	TRAES3BF083500030CFD_c1	ABC_tran&ABC2_membrane&ABC2_membrane	DUF1250	PDR_assoc	Membrane trafficking
Loss of a Inhibition Domain	TRAES3BF051300040CFD_c1	PWWP&PHD		Toxin-deaminase&SAND&PHD_2&zf-HC5HC2H_2&SET	Epigenetic regulation
Loss of a Inhibition Domain	TRAES3BF058500030CFD_c1	NIF
Loss of a Inhibition Domain	TRAES3BF093600010CFD_c1		YopD	Alpha-amylase&Alpha-amyl_C2
Loss of a Inhibition Domain	TRAES3BF028000050CFD_c1	NifU_N
Loss of a Inhibition Domain	TRAES3BF028000040CFD_c1	ECH
Loss of a Inhibition Domain	TRAES3BF029400010CFD_c1	JAB	DCAF15_WD40	Ribonuc_red_lgC	Protein degradation
Loss of a Inhibition Domain	TRAES3BF031900020CFD_c1
Loss of a Inhibition Domain	TRAES3BF132100020CFD_c1	Voltage_CLC&CBS			Membrane trafficking
Loss of a Inhibition Domain	TRAES3BF076000040CFD_c1	Lysine_decarbox
Loss of a Inhibition Domain	TRAES3BF026500060CFD_c1	ABC_membrane&ABC_tran&ABC_membrane&ABC_tran			Membrane trafficking
Loss of a Inhibition Domain	TRAES3BF026500020CFD_c1	PALP
Loss of a Inhibition Domain	TRAES3BF073300090CFD_c1	F-box	LRR_4	LRR_8&FBD	Ubiquitylation
Loss of a Inhibition Domain	TRAES3BF090300040CFD_c1	PEPcase
Loss of a Inhibition Domain	TRAES3BF081500050CFD_c1
Loss of a Inhibition Domain	TRAES3BF060000060CFD_c1	Peptidase_M16_C&Peptidase_M16_C		Peptidase_M16	Protein degradation
Loss of a Inhibition Domain	TRAES3BF027700240CFD_c1			Las1
Loss of a Inhibition Domain	TRAES3BF099200030CFD_c1	Vps36_ESCRT-II&EAP30	MRP-S28	Flagellin_N	Protein degradation
Loss of a Inhibition Domain	TRAES3BF057800010CFD_c1	Btz
Loss of a Inhibition Domain	TRAES3BF001300010CFD_c1		GST_C_2&NARP1	GST_C_3&Neur_chan_memb&tRNA_bind
Loss of a Inhibition Domain	TRAES3BF032200100CFD_c1	Nodulin-like		MFS_1
Loss of a Inhibition Domain	TRAES3BF093900020CFD_c1	Ureidogly_hydro
Loss of a Inhibition Domain	TRAES3BF009500030CFD_c1		GHMP_kinases_N&Abi	CTP_transf_1
Loss of a Inhibition Domain	TRAES3BF117500040CFD_c1	A_thal_3526	Fcf1	rpo132
Loss of a Inhibition Domain	TRAES3BF112600010CFD_c1	UQ_con
Loss of a Inhibition Domain	TRAES3BF142500030CFD_c1	MFS_1	OCIA
Loss of a Inhibition Domain	TRAES3BF275200040CFD_c1	Abhydrolase_6&Acyl_transf_1
Loss of a Inhibition Domain	TRAES3BF006700030CFD_c1	RRM_5&RRM_5	TraG-D_C	RRM_6&RRM_6
Loss of a Inhibition Domain	TRAES3BF044000050CFD_c1	COG7&RINT1_TIP1	Baculo_gp41&Sec15	Vps53_N&CTV_P33	Membrane trafficking
Loss of a Inhibition Domain	TRAES3BF114600190CFD_c1			Tachylectin&DUF910
Loss of a Inhibition Domain	TRAES3BF021600010CFD_c1		Arc	HUN
Loss of a Inhibition Domain	TRAES3BF024100090CFD_c1	zf-SNAP50_C
Loss of a Inhibition Domain	TRAES3BF066400040CFD_c1	Ribophorin_II			Glycosylation
Loss of a Inhibition Domain	TRAES3BF152900030CFD_c1	RRM_1
Loss of a Inhibition Domain	TRAES3BF092600010CFD_c1	TOM20_plant		Lipoprotein_1	Membrane trafficking
Loss of a Inhibition Domain	TRAES3BF087100050CFD_c1	B_lectin&S_locus_glycop&PAN_2		Pkinase	Membrane trafficking
Loss of a Inhibition Domain	TRAES3BF041300090CFD_c1			Thioredox_DsbH
Loss of a Inhibition Domain	TRAES3BF047500090CFD_c1	NB-ARC	Myb_DNA-bind_5	DOT1&LRR_4&LRR_4
Loss of a Inhibition Domain	TRAES3BF039600150CFD_c1	Pkinase_Tyr	DUF4286
Loss of a Inhibition Domain	TRAES3BF266400030CFD_c1
Upregulation of Expression	TRAES3BF062700010CFD_c1	Malectin_like&LRRNT_2&LRR_8		Mid2&EphA2_TM	Membrane trafficking
Upregulation of Expression	TRAES3BF026700080CFD_c1
Upregulation of Expression	TRAES3BF118400020CFD_c1	LEA_5
Upregulation of Expression	TRAES3BF102700110CFD_c1	PQ-loop&PQ-loop			Membrane trafficking
Upregulation of Expression	TRAES3BF032200060CFD_c1	Aa_trans
Upregulation of Expression	TRAES3BF100900030CFD_c1	Fer2			Membrane trafficking &Degradaion
Upregulation of Expression	TRAES3BF043700050CFD_c1	Glyco_hydro_35&BetaGal_dom4_5&Gal_Lectin	Leu_Phe_trans		Glycosylation
Upregulation of Expression	TRAES3BF098400010CFD_c1	Aa_trans
Upregulation of Expression	TRAES3BF082800230CFD_c1	AA_kinase	DUF1556&SPA
Upregulation of Expression	TRAES3BF065400210CFD_c1	PAE	Abhydrolase_5	Peptidase_S9	Protein degradation
