# Supplementary material for: Genome comparison implies the role of Wsm2 in membrane trafficking and protein degradation
Source: PeerJ. 2018 Apr 23;6:e4678. doi: 10.7717/peerj.4678 (PMC5918131; doi:10.7717/peerj.4678)
Supplement: Table S3 [file peerj-06-4678-s005.xlsx]

## Sheet: Sheet1
Table S3. Experimental raw data for WSMV infectivity tests on Nipponbare and Bd21-3
Sample number, ELISA values (1 hour readings), and the number of times greater than the equivalent healthy value [GHV = (Sample ELISA value / Healthy ELISA value)] of wheat samples tested against WSMV antiserum.
					WSMV
Line	Temp	Row	Rep	Sample	ELISA	GHV
Rice	18C	1	1	1	-0.001	-0.0833333
	18C	1	1	2	0.006	0.5
	18C	1	1	3	0	0
	18C	1	1	4	0.007	0.583333
	18C	1	1	5	0.007	0.583333
	18C	1	1	6	0.011	0.916667
	18C	1	1	7	0.014	1.16667
	18C	1	1	8	0.007	0.583333
	18C	1	1	9	0.079	6.58333	+
	18C	1	1	10	0.004	0.333333
	18C	1	1	11	0.025	2.08333	+
	18C	1	1	12	0.013	1.08333
RonL	18C	2	1	13	0.018	1.5
	18C	2	1	14	0.147	12.25	+
	18C	2	1	15	0.02	1.66667
	18C	2	1	16	0.02	1.66667
	18C	2	1	17	0.008	0.666667
	18C	2	1	18	0.022	1.83333
	18C	2	1	19	0.006	0.5
	18C	2	1	20	0.019	1.58333
	18C	2	1	21	0.016	1.33333
	18C	2	1	22	0.015	1.25
Tomahawk	18C	3	1	23	0.328	27.3333	+
	18C	3	1	24	0.479	39.9167	+
	18C	3	1	25	0.304	25.3333	+
	18C	3	1	26	0.297	24.75	+
	18C	3	1	27	0.489	40.75	+
	18C	3	1	28	0.237	19.75	+
	18C	3	1	29	0.169	14.0833	+
	18C	3	1	30	0.218	18.1667	+
	18C	3	1	31	0.219	18.25	+
	18C	3	1	32	0.229	19.0833	+
	18C	3	1	33	0.216	18	+
Bd21-3	18C	4	1	34	0.624	52	+
	18C	4	1	35	0.001	0.0833333
	18C	4	1	36	0.012	1
	18C	4	1	37	0.066	5.5	+
	18C	4	1	38	0.431	35.9167	+
	18C	4	1	39	0.245	20.4167	+
	18C	4	1	40	0.381	31.75	+
	18C	4	1	41	0.495	41.25	+
	18C	4	1	42	0.668	55.6667	+
	18C	4	1	43	0.568	47.3333	+
Rice	18C	5	2	44	0.001	0.0833333
	18C	5	2	45	0.006	0.5
	18C	5	2	46	0.003	0.25
	18C	5	2	47	0.005	0.416667
	18C	5	2	48	0.008	0.666667
	18C	5	2	49	-0.01	-0.833333
	18C	5	2	50	0.005	0.416667
	18C	5	2	51	0.005	0.416667
RonL	18C	6	2	52	0.014	1.16667
	18C	6	2	53	0.036	3	+
	18C	6	2	54	0.015	1.25
	18C	6	2	55	0.017	1.41667
	18C	6	2	56	0.025	2.08333	+
	18C	6	2	57	0.002	0.166667
	18C	6	2	58	0.014	1.16667
	18C	6	2	59	0.015	1.25
	18C	6	2	60	0.015	1.25
	18C	6	2	61	0.014	1.16667
	18C	6	2	62	0.015	1.25
Tomahawk	18C	7	2	63	0.274	22.8333	+
	18C	7	2	64	0.366	30.5	+
	18C	7	2	65	0.291	24.25	+
	18C	7	2	66	0.307	25.5833	+
	18C	7	2	67	0.264	22	+
	18C	7	2	68	0.258	21.5	+
	18C	7	2	69	0.26	21.6667	+
	18C	7	2	70	0.24	20	+
	18C	7	2	71	0.251	20.9167	+
	18C	7	2	72	0.319	26.5833	+
	18C	7	2	73	0.6	50	+
Bd21-3	18C	8	2	74	0.59	49.1667	+
	18C	8	2	75	0.313	26.0833	+
	18C	8	2	76	0.319	26.5833	+
	18C	8	2	77	0.494	41.1667	+
	18C	8	2	78	0.44	36.6667	+
	18C	8	2	79	0.013	1.08333
	18C	8	2	80	0.542	45.1667	+
Rice	22C	1	1	81	0.008	0.666667
	22C	1	1	82	0.004	0.333333
RonL	22C	2	1	83	0.499	41.5833	+
	22C	2	1	84	0.417	34.75	+
	22C	2	1	85	0.469	39.0833	+
	22C	2	1	86	0.46	38.3333	+
	22C	2	1	87	0.699	58.25	+
	22C	2	1	88	0.508	42.3333	+
	22C	2	1	89	0.988	82.3333	+
	22C	2	1	90	0.876	73	+
	22C	2	1	91	0.63	52.5	+
	22C	2	1	92	0.483	40.25	+
	22C	2	1	93	0.732	61	+
	22C	2	1	94	0.73	60.8333	+
Tomahawk	22C	3	1	95	0.514	42.8333	+
	22C	3	1	96	0.531	44.25	+
	22C	3	1	97	0.419	34.9167	+
	22C	3	1	98	0.334	27.8333	+
	22C	3	1	99	0.379	31.5833	+
	22C	3	1	100	0.49	40.8333	+
	22C	3	1	101	0.409	34.0833	+
	22C	3	1	102	0.421	35.0833	+
	22C	3	1	103	0.457	38.0833	+
	22C	3	1	104	0.443	36.9167	+
Bd21-3	22C	4	1	105	0.6	50	+
	22C	4	1	106	0.479	39.9167	+
	22C	4	1	107	0.455	37.9167	+
	22C	4	1	108	0.018	1.5
	22C	4	1	109	0.453	37.75	+
	22C	4	1	110	0.261	21.75	+
	22C	4	1	111	0.297	24.75	+
	22C	4	1	112	0.198	16.5	+
RonL	22C	6	2	113	0.611	50.9167	+
	22C	6	2	114	0.529	44.0833	+
	22C	6	2	115	0.543	45.25	+
	22C	6	2	116	0.474	39.5	+
	22C	6	2	117	0.452	37.6667	+
	22C	6	2	118	0.635	52.9167	+
	22C	6	2	119	0.519	43.25	+
	22C	6	2	120	0.689	57.4167	+
	22C	6	2	121	0.632	52.6667	+
	22C	6	2	122	0.66	55	+
	22C	6	2	123	0.586	48.8333	+
Tomahawk	22C	7	2	124	0.402	33.5	+
	22C	7	2	125	0.315	26.25	+
	22C	7	2	126	0.366	30.5	+
	22C	7	2	127	0.466	38.8333	+
	22C	7	2	128	0.429	35.75	+
	22C	7	2	129	0.407	33.9167	+
	22C	7	2	130	0.467	38.9167	+
	22C	7	2	131	0.372	31	+
	22C	7	2	132	0.397	33.0833	+
	22C	7	2	133	0.427	35.5833	+
Bd21-3	22C	8	2	134	0.358	29.8333	+
	22C	8	2	135	0.421	35.0833	+
	22C	8	2	136	0.272	22.6667	+
	22C	8	2	137	0.015	1.25
	22C	8	2	138	0.335	27.9167	+
	22C	8	2	139	0.017	1.41667
	22C	8	2	140	0.031	2.58333	+
	22C	8	2	141	0.539	44.9167	+
	22C	8	2	142	0.626	52.1667	+
	22C	8	2	143	0.021	1.75
Rice	22C	5	2	144	-0.01	-0.833333
				Healthy	0.018	1.5
				Healthy	0.006	0.5
				WSMV-Sid81	0.46	38.3333	+
				Ave Healthy wheat	0.012	1
