# Supplementary material for: Genome comparison implies the role of Wsm2 in membrane trafficking and protein degradation
Source: PeerJ. 2018 Apr 23;6:e4678. doi: 10.7717/peerj.4678 (PMC5918131; doi:10.7717/peerj.4678)
Supplement: Table S4 [file peerj-06-4678-s006.xlsx]

## Sheet: Sheet1
Table S4. Experimental raw data for WSMV infectivity tests on 45 Brachypodium natural variants.
Sample number, ELISA values (1 hour readings), and the number of times greater than the equivalent healthy value [GHV = (Sample ELISA value / Healthy ELISA value)] of Brachypodium samples tested against WSMV antiserum.
					WSMV
Flat	Row	Line #	Line	Sample	ELISA	GHV
1	1	1	ABRS	1	0.51	75	+
1	1	1	ABRS	2	0.519	76.3235	+
1	1	1	ABRS	3	0.449	66.0294	+
1	1	1	ABRS	4	0.529	77.7941	+
1	1	1	ABRS	5	0.486	71.4706	+
1	1	1	ABRS	6	0.543	79.8529	+
1	1	1	ABRS	7	0.718	105.588	+
1	2	2	ABR4	8	0.56	82.3529	+
1	2	2	ABR4	9	0.635	93.3824	+
1	2	2	ABR4	10	0.565	83.0882	+
1	2	2	ABR4	11	0.537	78.9706	+
1	2	2	ABR4	12	0.513	75.4412	+
1	2	2	ABR4	13	0.548	80.5882	+
1	2	2	ABR4	14	0.47	69.1176	+
1	3	3	Adi-2	15	0.731	107.5	+
1	3	3	Adi-2	16	0.56	82.3529	+
1	3	3	Adi-2	17	0.609	89.5588	+
1	3	3	Adi-2	18	0.509	74.8529	+
1	4	4	Adi-10	19	0.597	87.7941	+
1	4	4	Adi-10	20	0.472	69.4118	+
1	4	4	Adi-10	21	0.424	62.3529	+
1	4	4	Adi-10	22	0.426	62.6471	+
1	4	4	Adi-10	23	0.514	75.5882	+
1	5	5	ARN1	24	0.5	73.5294	+
1	5	5	ARN1	25	0.579	85.1471	+
1	5	5	ARN1	26	0.406	59.7059	+
1	5	5	ARN1	27	0.61	89.7059	+
1	5	5	ARN1	28	0.553	81.3235	+
1	5	5	ARN1	29	0.63	92.6471	+
1	5	5	ARN1	30	0.535	78.6765	+
1	5	5	ARN1	31	0.415	61.0294	+
1	5	5	ARN1	32	0.546	80.2941	+
1	6	6	Bd1-1	33	0.595	87.5	+
1	6	6	Bd1-1	34	0.571	83.9706	+
1	6	6	Bd1-1	35	0.489	71.9118	+
1	6	6	Bd1-1	36	0.609	89.5588	+
1	6	6	Bd1-1	37	0.58	85.2941	+
1	7	7	Bd2-3	38	0.45	66.1765	+
1	7	7	Bd2-3	39	0.462	67.9412	+
1	7	7	Bd2-3	40	0.45	66.1765	+
1	7	7	Bd2-3	41	0.53	77.9412	+
1	7	7	Bd2-3	42	0.592	87.0588	+
1	8	8	Bd3-1	43	0.523	76.9118	+
1	8	8	Bd3-1	44	0.514	75.5882	+
1	8	8	Bd3-1	45	0.624	91.7647	+
1	8	8	Bd3-1	46	0.535	78.6765	+
1	8	8	Bd3-1	47	0.495	72.7941	+
1	9	9	Bd21-1	48	0.743	109.265	+
1	9	9	Bd21-1	49	0.566	83.2353	+
1	9	9	Bd21-1	50	0.561	82.5	+
1	9	9	Bd21-1	51	0.546	80.2941	+
1	9	9	Bd21-1	52	0.583	85.7353	+
1	9	9	Bd21-1	53	0.636	93.5294	+
1	9	9	Bd21-1	54	0.022	3.23529	+
1	10	10	Bd21-3	55	0.586	86.1765	+
1	10	10	Bd21-3	56	0.508	74.7059	+
1	10	10	Bd21-3	57	0.678	99.7059	+
1	10	10	Bd21-3	58	0.646	95	+
1	10	10	Bd21-3	59	0.631	92.7941	+
1	10	10	Bd21-3	60	0.634	93.2353	+
1	10	10	Bd21-3	61	0.466	68.5294	+
1	11	11	Bd29-1	62	0.018	2.64706	+
1	11	11	Bd29-1	63	0.449	66.0294	+
1	11	11	Bd29-1	64	0.593	87.2059	+
1	11	11	Bd29-1	65	0.402	59.1176	+
1	11	11	Bd29-1	66	0.426	62.6471	+
1	11	11	Bd29-1	67	0.382	56.1765	+
1	11	11	Bd29-1	68	0.572	84.1176	+
1	11	11	Bd29-1	69	0.347	51.0294	+
1	11	11	Bd29-1	70	0.417	61.3235	+
1	12	12	Bd30-1	71	0.462	67.9412	+
1	12	12	Bd30-1	72	0.504	74.1176	+
1	12	12	Bd30-1	73	0.54	79.4118	+
1	12	12	Bd30-1	74	0.451	66.3235	+
1	12	12	Bd30-1	75	0.496	72.9412	+
1	12	12	Bd30-1	76	0.507	74.5588	+
1	12	12	Bd30-1	77	0.526	77.3529	+
1	13	13	Bis1	78	0.59	86.7647	+
1	13	13	Bis1	79	0.545	80.1471	+
1	13	13	Bis1	80	0.653	96.0294	+
1	13	13	Bis1	81	0.551	81.0294	+
1	13	13	Bis1	82	0.567	83.3824	+
1	14	14	Foz1	83	0.515	75.7353	+
1	14	14	Foz1	84	0.475	69.8529	+
1	14	14	Foz1	85	0.522	76.7647	+
1	15	15	Gaz8	86	0.447	65.7353	+
1	15	15	Gaz8	87	0.499	73.3824	+
1	15	15	Gaz8	88	0.551	81.0294	+
1	15	15	Gaz8	89	0.546	80.2941	+
1	15	15	Gaz8	90	0.526	77.3529	+
1	16	16	Kah-1	91	0.445	65.4412	+
1	16	16	Kah-1	92	0.516	75.8824	+
1	16	16	Kah-1	93	0.474	69.7059	+
1	16	16	Kah-1	94	0.515	75.7353	+
1	16	16	Kah-1	95	0.485	71.3235	+
1	16	16	Kah-1	96	0.46	67.6471	+
1	17	17	Kah-S	97	0.583	85.7353	+
1	17	17	Kah-S	98	0.538	79.1176	+
1	17	17	Kah-S	99	0.492	72.3529	+
1	17	17	Kah-S	100	0.4	58.8235	+
1	17	17	Kah-S	101	0.417	61.3235	+
1	17	17	Kah-S	102	0.394	57.9412	+
1	18	18	Koz1	103	0.49	72.0588	+
1	18	18	Koz1	104	0.554	81.4706	+
1	18	18	Koz1	105	0.451	66.3235	+
1	18	18	Koz1	106	0.409	60.1471	+
1	18	18	Koz1	107	0.448	65.8824	+
1	18	18	Koz1	108	0.576	84.7059	+
1	18	18	Koz1	109	0.442	65	+
1	18	18	Koz1	110	0.48	70.5882	+
1	19	19	Koz3	111	0.482	70.8824	+
1	19	19	Koz3	112	0.734	107.941	+
1	19	19	Koz3	113	0.445	65.4412	+
1	19	19	Koz3	114	0.488	71.7647	+
1	19	19	Koz3	115	0.45	66.1765	+
1	19	19	Koz3	116	0.425	62.5	+
1	19	19	Koz3	117	0.472	69.4118	+
1	20	20	Luc1	118	0.5	73.5294	+
1	20	20	Luc1	119	0.672	98.8235	+
1	20	20	Luc1	120	0.404	59.4118	+
1	20	20	Luc1	121	0.404	59.4118	+
1	20	20	Luc1	122	0.546	80.2941	+
1	20	20	Luc1	123	0.4	58.8235	+
1	20	20	Luc1	124	0.465	68.3824	+
1	21	21	Mig3	125	0.423	62.2059	+
1	21	21	Mig3	126	0.429	63.0882	+
1	21	21	Mig3	127	0.544	80	+
1	21	21	Mig3	128	0.528	77.6471	+
1	21	21	Mig3	129	0.476	70	+
1	21	21	Mig3	130	0.472	69.4118	+
1	21	21	Mig3	131	0.474	69.7059	+
1	21	21	Mig3	132	0.54	79.4118	+
1	21	21	Mig3	133	0.478	70.2941	+
1	22	22	Mon3	134	0.686	100.882	+
1	22	22	Mon3	135	0.726	106.765	+
1	22	22	Mon3	136	0.714	105	+
1	22	22	Mon3	137	0.709	104.265	+
1	22	22	Mon3	138	0.978	143.824	+
2	23	23	Mur1	139	0.014	2.05882	+
2	23	23	Mur1	140	0.402	59.1176	+
2	23	23	Mur1	141	0.472	69.4118	+
2	23	23	Mur1	142	0.462	67.9412	+
2	23	23	Mur1	143	0.59	86.7647	+
2	23	23	Mur1	144	0.654	96.1765	+
2	23	23	Mur1	145	0.429	63.0882	+
2	24	24	Per1	146	0.498	73.2353	+
2	24	24	Per1	147	0.472	69.4118	+
2	24	24	Per1	148	0.496	72.9412	+
2	24	24	Per1	149	0.502	73.8235	+
2	24	24	Per1	150	0.586	86.1765	+
2	24	24	Per1	151	0.584	85.8824	+
2	24	24	Per1	152	0.566	83.2353	+
2	25	25	RON2	153	0.574	84.4118	+
2	25	25	RON2	154	0.574	84.4118	+
2	25	25	RON2	155	0.715	105.147	+
2	25	25	RON2	156	0.579	85.1471	+
2	25	25	RON2	157	0.591	86.9118	+
2	25	25	RON2	158	0.595	87.5	+
2	25	25	RON2	159	0.56	82.3529	+
2	25	25	RON2	160	0.684	100.588	+
2	26	26	Sig2	161	0.594	87.3529	+
2	26	26	Sig2	162	0.532	78.2353	+
2	26	26	Sig2	163	0.656	96.4706	+
2	26	26	Sig2	164	0.574	84.4118	+
2	26	26	Sig2	165	0.56	82.3529	+
2	26	26	Sig2	166	0.745	109.559	+
2	26	26	Sig2	167	0.516	75.8824	+
2	27	27	TEK-2	168	0.534	78.5294	+
2	27	27	TEK-2	169	0.456	67.0588	+
2	27	27	TEK-2	170	0.404	59.4118	+
2	27	27	TEK-2	171	0.407	59.8529	+
2	27	27	TEK-2	172	0.457	67.2059	+
2	27	27	TEK-2	173	0.429	63.0882	+
2	27	27	TEK-2	174	0.476	70	+
2	28	28	TEK-4	175	0.743	109.265	+
2	28	28	TEK-4	176	0.68	100	+
2	28	28	TEK-4	177	0.634	93.2353	+
2	28	28	TEK-4	178	0.684	100.588	+
2	28	28	TEK-4	179	0.588	86.4706	+
2	28	28	TEK-4	180	0.526	77.3529	+
2	28	28	TEK-4	181	0.666	97.9412	+
2	28	28	TEK-4	182	0.611	89.8529	+
2	29	29	TEK11	183	0.685	100.735	+
2	29	29	TEK11	184	0.508	74.7059	+
2	29	29	TEK11	185	0.53	77.9412	+
2	29	29	TEK11	186	0.59	86.7647	+
2	29	29	TEK11	187	0.539	79.2647	+
2	29	29	TEK11	188	0.685	100.735	+
2	29	29	TEK11	189	0.565	83.0882	+
2	30	30	TR2B	190	0.614	90.2941	+
2	30	30	TR2B	191	0.546	80.2941	+
2	30	30	TR2B	192	0.561	82.5	+
2	30	30	TR2B	193	0.54	79.4118	+
2	30	30	TR2B	194	0.546	80.2941	+
2	30	30	TR2B	195	0.502	73.8235	+
2	30	30	TR2B	196	0.554	81.4706	+
2	31	31	TR3C	197	0.579	85.1471	+
2	31	31	TR3C	198	0.597	87.7941	+
2	31	31	TR3C	199	0.646	95	+
2	31	31	TR3C	200	0.572	84.1176	+
2	31	31	TR3C	201	0.625	91.9118	+
2	31	31	TR3C	202	0.67	98.5294	+
2	31	31	TR3C	203	0.547	80.4412	+
2	31	31	TR3C	204	0.656	96.4706	+
2	32	32	TR7a	205	0.52	76.4706	+
2	32	32	TR7a	206	0.64	94.1176	+
2	32	32	TR7a	207	0.028	4.11765	+
2	32	32	TR7a	208	0.519	76.3235	+
2	32	32	TR7a	209	0.413	60.7353	+
2	33	33	TR8i	210	0.529	77.7941	+
2	33	33	TR8i	211	0.509	74.8529	+
2	33	33	TR8i	212	0.442	65	+
2	33	33	TR8i	213	0.634	93.2353	+
2	33	33	TR8i	214	0.04	5.88235	+
2	33	33	TR8i	215	0.507	74.5588	+
2	33	33	TR8i	216	0.506	74.4118	+
2	33	33	TR8i	217	0.422	62.0588	+
2	33	33	TR8i	218	0.507	74.5588	+
2	34	34	TR9K	219	0.645	94.8529	+
2	34	34	TR9K	220	0.034	5	+
2	34	34	TR9K	221	0.552	81.1765	+
2	34	34	TR9K	222	0.036	5.29412	+
2	34	34	TR9K	223	0.575	84.5588	+
2	34	34	TR9K	224	0.636	93.5294	+
2	34	34	TR9K	225	0.627	92.2059	+
2	35	35	TR10C	226	0.576	84.7059	+
2	35	35	TR10C	227	0.526	77.3529	+
2	35	35	TR10C	228	0.736	108.235	+
2	35	35	TR10C	229	0.527	77.5	+
2	35	35	TR10C	230	0.604	88.8235	+
2	35	35	TR10C	231	0.605	88.9706	+
2	36	36	TR11A	232	0.449	66.0294	+
2	36	36	TR11A	233	0.664	97.6471	+
2	36	36	TR11A	234	0.494	72.6471	+
2	36	36	TR11A	235	0.601	88.3824	+
2	36	36	TR11A	236	0.48	70.5882	+
2	36	36	TR11A	237	0.534	78.5294	+
2	36	36	TR11A	238	0.577	84.8529	+
2	36	36	TR11A	239	0.575	84.5588	+
2	37	37	TR11G	240	0.482	70.8824	+
2	37	37	TR11G	241	0.478	70.2941	+
2	37	37	TR11G	242	0.522	76.7647	+
2	37	37	TR11G	243	0.586	86.1765	+
2	37	37	TR11G	244	0.542	79.7059	+
2	37	37	TR11G	245	0.527	77.5	+
2	37	37	TR11G	246	0.424	62.3529	+
2	38	38	TR12C	247	0.481	70.7353	+
2	38	38	TR12C	248	0.492	72.3529	+
2	38	38	TR12C	249	0.025	3.67647	+
2	38	38	TR12C	250	0.436	64.1176	+
2	38	38	TR12C	251	0.482	70.8824	+
2	39	39	TRBa	252	0.6	88.2353	+
2	39	39	TRBa	253	0.533	78.3824	+
2	39	39	TRBa	254	0.457	67.2059	+
2	39	39	TRBa	255	0.557	81.9118	+
2	39	39	TRBa	256	0.536	78.8235	+
2	39	39	TRBa	257	0.804	118.235	+
2	40	40	TR13C	258	0.755	111.029	+
2	40	40	TR13C	259	0.638	93.8235	+
2	40	40	TR13C	260	0.684	100.588	+
2	40	40	TR13C	261	0.611	89.8529	+
2	40	40	TR13C	262	0.749	110.147	+
2	40	40	TR13C	263	0.493	72.5	+
2	40	40	TR13C	264	0.588	86.4706	+
2	40	40	TR13C	265	0.496	72.9412	+
2	41	41	TR26	266	0.423	62.2059	+
2	41	41	TR26	267	0.548	80.5882	+
2	41	41	TR26	268	0.468	68.8235	+
2	41	41	TR26	269	0.534	78.5294	+
2	41	41	TR26	270	0.538	79.1176	+
2	41	41	TR26	271	0.668	98.2353	+
2	42	42	TRIi	272	0.65	95.5882	+
2	42	42	TRIi	273	0.607	89.2647	+
2	42	42	TRIi	274	0.568	83.5294	+
2	42	42	TRIi	275	0.506	74.4118	+
2	42	42	TRIi	276	0.611	89.8529	+
2	42	42	TRIi	277	0.51	75	+
2	42	42	TRIi	278	0.562	82.6471	+
2	42	42	TRIi	279	0.636	93.5294	+
2	42	42	TRIi	280	0.601	88.3824	+
2	43	43	TRSi	281	0.593	87.2059	+
2	43	43	TRSi	282	0.584	85.8824	+
2	43	43	TRSi	283	0.68	100	+
2	43	43	TRSi	284	0.587	86.3235	+
2	43	43	TRSi	285	0.639	93.9706	+
2	43	43	TRSi	286	0.675	99.2647	+
2	43	43	TRSi	287	0.53	77.9412	+
2	44	44	Uni2	288	0.49	72.0588	+
2	44	44	Uni2	289	0.558	82.0588	+
2	44	44	Uni2	290	0.725	106.618	+
2	44	44	Uni2	291	0.681	100.147	+
2	44	44	Uni2	292	0.888	130.588	+
2	44	44	Uni2	293	0.697	102.5	+
2	44	44	Uni2	294	0.68	100	+
2	44	44	Uni2	295	0.749	110.147	+
2	45	45	18-1	296	0.581	85.4412	+
2	45	45	18-1	297	0.521	76.6176	+
2	45	45	18-1	298	0.623	91.6176	+
2	45	45	18-1	299	0.52	76.4706	+
2	45	45	18-1	300	0.546	80.2941	+
2	45	45	18-1	301	0.601	88.3824	+
2	46	10		Healthy Brachy 1	0.014	2.05882
2	46	10		Healthy Brachy 2	-0.001	-0.147059
2	46	10		Healthy Brachy 3	0.011	1.61765
2	46	10		Healthy Brachy 4	-0.003	-0.441176
2	46	10		Healthy Brachy 5	0.013	1.91176
				Average Brachy Healthy	0.0068	1
*Healthy Brachy is BD21-3
